# Supplementary material
Source: PubMed Central journal article supplement (PMC7402082)
Supplement: NIHMS1612838-supplement-Figure_S1.pdf [file NIHMS1612838-supplement-Figure_S1.pdf]

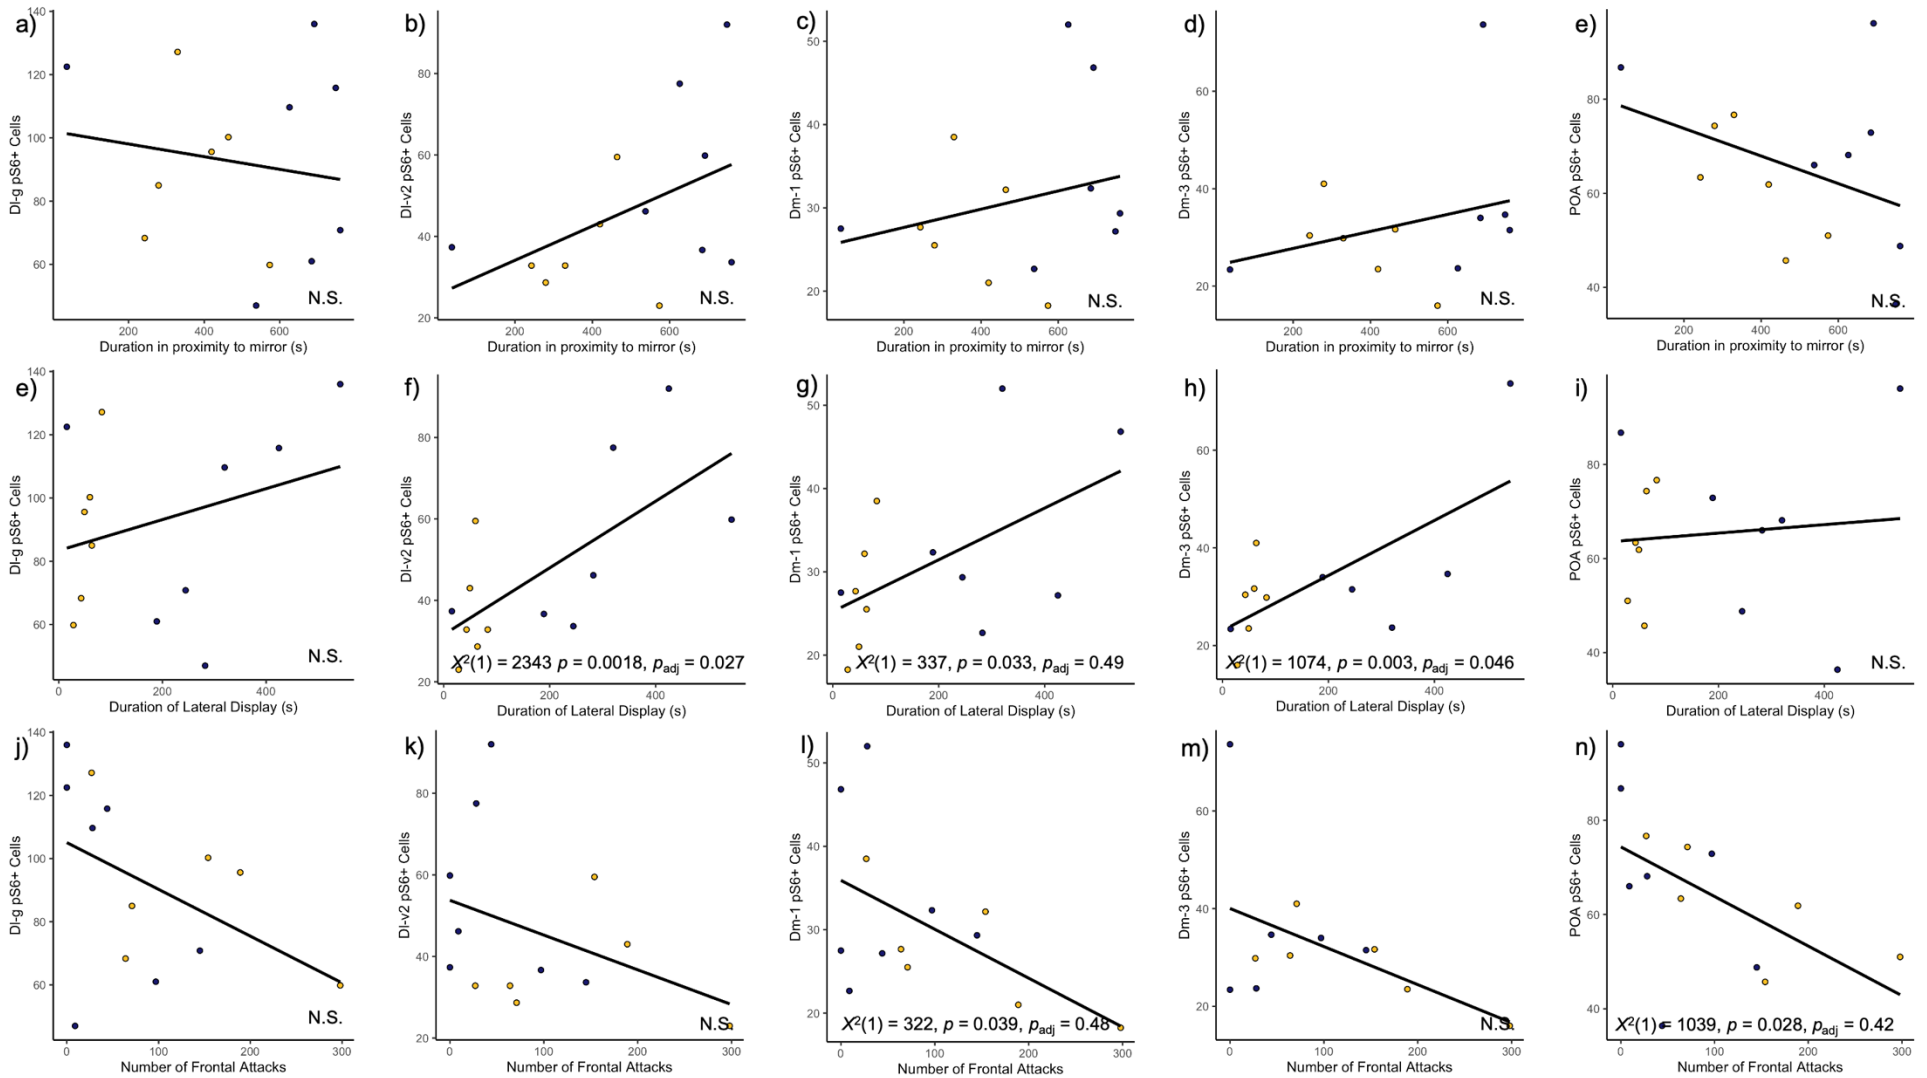

Supplementary figure 1: Scatterplots of mean number of cells immunopositive for pS6 in *M. conophoros* (sand, blue) versus *P. chtimba* (rock, yellow) in the mirror condition only across 5 brain regions (DI-g: a,e,j; DI-v2: b,f,k; Dm-1: c,g,l; Dm-3: d,h,m; POA: e,i,n) and 3 behaviors (Duration of proximity to the mirror: a,b,c,d,e; Duration of lateral display: e,f,g,h,i; and Number of Frontal Attacks: j,k,l,m,n). Granular zone of lateral zone of the dorsal telencephalon, DI-g; ventral part of the lateral zone of the dorsal telencephalon, subdivision 2, DI-v2; medial part of the dorsal telencephalon, subdivision 1, Dm-1; medial part of the dorsal telencephalon, subdivision 3, Dm-3; and preoptic area, POA. Both the unadjusted  $p$ -value and Bonferroni-corrected  $p$  value ( $p_{adj}$ ) are reported.
